# Supplementary material
Source: PubMed Central journal article supplement (PMC7817251)
Supplement: NIHMS1656452-supplement-Supplemental.pdf [file NIHMS1656452-supplement-Supplemental.pdf]

## Supplementary Appendix

### *Registry diagnosis of dementia*

The following ICD codes from editions 8, 9 and 10 were used in identifying cases of dementia in the National Patient Register and Cause of Death Register:

ICD-8: 290.00, 290.10, 290.11, 290.19, 293.00

ICD-9: 290A, 290B, 290E, 290W, 290X, 294B, 331A

ICD-10: A81.0, F00.0, F00.1, F00.2, F00.9, F01.0, F01.1, F01.2, F01.3, F01.8, F01.9, F02.0, F02.1, F02.3, F02.8, F03.9, F05.1, G30.0, G30.1, G30.8, G30.9, G31.0, G318A
